# Supplementary material for: Magnification in preclinical procedures: effect on muscle activity and angular deviations of the neck and trunk
Source: PeerJ. 2024 Apr 19;12:e17188. doi: 10.7717/peerj.17188 (PMC11034494; doi:10.7717/peerj.17188)
Supplement: Data S1 — The electromyographic and angular deviation of the neck and trunk measures. [file peerj-12-17188-s001.xlsx]

## Sheet: EMG
Right Sternocleidomastoid				Left Sternocleidomastoid				Right descending trapezius				Left descending trapezius				Right ascending trapezius				Left ascending trapezius
LOUPE	TOOTH	NORMALIZED EMG		LOUPE	TOOTH	NORMALIZED EMG		LOUPE	TOOTH	NORMALIZED EMG		LOUPE	TOOTH	NORMALIZED EMG		LOUPE	TOOTH	NORMALIZED EMG		LOUPE	TOOTH	NORMALIZED EMG
1	16	9.11312		1	16	3.11252		1	16	32.0017		1	16	46.3804		1	16	10.9674		1	16	12.1411
1	16	8.72628		1	16	2.43491		1	16	30.8599		1	16	47.3138		1	16	13.7555		1	16	15.6677
1	16	8.32327		1	16	2.24122		1	16	31.6798		1	16	24.9865		1	16	7.6003		1	16	12.4882
1	16	6.63888		1	16	2.148		1	16	30.5322		1	16	42.4555		1	16	7.57047		1	16	16.8291
1	16	7.54002		1	16	2.84058		1	16	29.6635		1	16	38.631		1	16	8.43403		1	16	10.678
1	16	6.55781		1	16	2.84058		1	16	28.3013		1	16	21.5773		1	16	10.0427		1	16	19.2126
1	16	5.79923		1	16	2.84058		1	16	26.6784		1	16	36.7666		1	16	12.7703		1	16	11.1945
1	16	4.96117		1	16	2.84058		1	16	29.7353		1	16	40.8895		1	16	13.7831		1	16	14.0439
1	16	9.18418		1	16	4.35912		1	16	35.3368		1	16	27.9008		1	16	10.3488		1	16	18.8632
1	16	6.46117		1	16	2.3443		1	16	33.5623		1	16	37.968		1	16	7.31231		1	16	8.2125
2	16	6.43718		2	16	5.13362		2	16	87.2025		2	16	53.2388		2	16	11.5153		2	16	20.6208
2	16	7.16638		2	16	3.12364		2	16	53.1258		2	16	59.3599		2	16	13.1049		2	16	18.7049
2	16	8.83301		2	16	3.32983		2	16	80.9148		2	16	46.3322		2	16	14.4496		2	16	20.1589
2	16	6.58407		2	16	3.78796		2	16	81.5457		2	16	46.4799		2	16	12.8002		2	16	11.9046
2	16	7.1282		2	16	2.84058		2	16	77.7589		2	16	42.5526		2	16	13.6009		2	16	19.3202
2	16	7.71279		2	16	2.84058		2	16	53.1258		2	16	45.6543		2	16	11.3743		2	16	13.6009
2	16	6.16231		2	16	2.84058		2	16	80.1593		2	16	45.4907		2	16	9.29302		2	16	12.6587
2	16	6.12777		2	16	2.97144		2	16	75.287		2	16	43.6605		2	16	11.9158		2	16	12.7944
2	16	6.87747		2	16	3.88398		2	16	53.1258		2	16	47.4165		2	16	12.726		2	16	16.669
2	16	6.44136		2	16	2.65034		2	16	53.1258		2	16	51.9774		2	16	13.1598		2	16	22.2472
3	16	4.22969		3	16	3.24137		3	16	22.5119		3	16	29.3201		3	16	8.40202		3	16	11.0207
3	16	4.93536		3	16	3.60195		3	16	37.1231		3	16	42.2177		3	16	14.2077		3	16	20.1895
3	16	5.92638		3	16	3.56728		3	16	27.6825		3	16	57.7811		3	16	7.21149		3	16	16.1081
3	16	4.47784		3	16	2.63067		3	16	37.2688		3	16	58.5401		3	16	9.17363		3	16	12.8652
3	16	5.98096		3	16	2.84058		3	16	43.6219		3	16	33.2326		3	16	9.03527		3	16	11.5559
3	16	4.81132		3	16	2.84058		3	16	29.1439		3	16	33.4143		3	16	12.8344		3	16	12.7614
3	16	6.13384		3	16	2.84058		3	16	36.7759		3	16	38.6096		3	16	17.25		3	16	7.78744
3	16	4.76357		3	16	3.60195		3	16	74.7719		3	16	59.3176		3	16	17.1636		3	16	3.65573
3	16	8.41725		3	16	3.933		3	16	26.6591		3	16	30.0207		3	16	10.4031		3	16	11.4472
3	16	7.51649		3	16	3.60195		3	16	31.6391		3	16	28.7756		3	16	8.40679		3	16	11.0893
4	16	5.73523		4	16	4.40637		4	16	58.7819		4	16	37.2238		4	16	12.2316		4	16	12.9376
4	16	6.50824		4	16	3.60195		4	16	59.5518		4	16	39.6138		4	16	13.8668		4	16	22.1059
4	16	7.16304		4	16	3.80016		4	16	54.8931		4	16	33.9145		4	16	13.3203		4	16	16.4406
4	16	6.45115		4	16	2.84058		4	16	62.4997		4	16	33.0144		4	16	7.99218		4	16	12.1804
4	16	8.23142		4	16	3.60195		4	16	71.4232		4	16	47.9406		4	16	17.8199		4	16	20.7038
4	16	8.20485		4	16	2.84058		4	16	56.0178		4	16	34.8422		4	16	15.5993		4	16	18.2317
4	16	6.17726		4	16	3.60195		4	16	80.548		4	16	34.251		4	16	19.4457		4	16	10.5406
4	16	6.549		4	16	3.92383		4	16	53.4078		4	16	36.3349		4	16	12.5619		4	16	21.819
4	16	6.42716		4	16	3.13168		4	16	60.8214		4	16	33.027		4	16	12.081		4	16	9.84559
4	16	7.64204		4	16	2.36977		4	16	57.7101		4	16	34.9978		4	16	12.636		4	16	13.2111
1	26	9.34298		1	26	3.0736		1	26	26.0541		1	26	22.1061		1	26	9.44674		1	26	22.4701
1	26	5.76696		1	26	3.11406		1	26	28.4508		1	26	19.3019		1	26	7.28071		1	26	19.1618
1	26	4.59216		1	26	4.24251		1	26	25.5368		1	26	16.7672		1	26	6.09885		1	26	17.7359
1	26	5.39637		1	26	2.43709		1	26	24.4322		1	26	20.4838		1	26	7.03237		1	26	23.4863
1	26	6.52144		1	26	3.43254		1	26	19.8774		1	26	21.1759		1	26	6.79749		1	26	14.1682
1	26	6.37623		1	26	3.43254		1	26	19.86		1	26	21.1759		1	26	8.8367		1	26	12.1217
1	26	4.88632		1	26	2.79963		1	26	30.1964		1	26	18.6753		1	26	9.71917		1	26	13.9995
1	26	4.78308		1	26	2.79963		1	26	27.8721		1	26	19.5841		1	26	7.04575		1	26	7.54089
1	26	6.61861		1	26	3.59998		1	26	35.4377		1	26	19.8212		1	26	8.0831		1	26	19.2773
1	26	5.74875		1	26	3.59998		1	26	29.1435		1	26	20.1811		1	26	13.5209		1	26	19.0656
2	26	6.22714		2	26	4.29146		2	26	48.2773		2	26	21.6782		2	26	15.9873		2	26	31.5744
2	26	9.04344		2	26	3.56725		2	26	34.348		2	26	23.7331		2	26	13.9706		2	26	20.7233
2	26	5.68673		2	26	3.68485		2	26	44.9716		2	26	21.1759		2	26	21.0862		2	26	30.2849
2	26	8.26117		2	26	4.1003		2	26	50.3646		2	26	21.1759		2	26	14.908		2	26	25.4056
2	26	5.98786		2	26	2.79963		2	26	46.5899		2	26	24.5988		2	26	11.5697		2	26	23.8914
2	26	7.23379		2	26	0.366845		2	26	34.348		2	26	21.9417		2	26	9.39664		2	26	29.3122
2	26	5.76211		2	26	3.49941		2	26	34.348		2	26	21.1759		2	26	18.3529		2	26	30.9918
2	26	6.10796		2	26	2.3172		2	26	50.6021		2	26	21.8078		2	26	9.10633		2	26	20.8183
2	26	7.48961		2	26	3.36917		2	26	34.348		2	26	23.2874		2	26	11.5886		2	26	24.1511
2	26	7.08197		2	26	2.71773		2	26	47.8359		2	26	27.246		2	26	11.4258		2	26	25.9116
3	26	5.58121		3	26	3.58214		3	26	16.9343		3	26	18.9566		3	26	6.34288		3	26	20.0518
3	26	6.61861		3	26	3.49941		3	26	26.3589		3	26	22.482		3	26	10.4928		3	26	25.4212
3	26	6.17916		3	26	2.67553		3	26	20.3969		3	26	21.1759		3	26	6.64841		3	26	21.2643
3	26	5.30459		3	26	3.34302		3	26	22.2016		3	26	26.1376		3	26	6.19182		3	26	19.3279
3	26	5.67192		3	26	3.43254		3	26	23.2964		3	26	20.6338		3	26	19.0226		3	26	10.5005
3	26	4.86704		3	26	3.43254		3	26	19.59		3	26	16.5778		3	26	10.8434		3	26	11.7554
3	26	4.84252		3	26	2.79963		3	26	25.0687		3	26	19.8703		3	26	11.1997		3	26	8.3786
3	26	4.89854		3	26	2.79963		3	26	35.8347		3	26	21.414		3	26	9.58463		3	26	8.40778
3	26	7.0227		3	26	4.66751		3	26	23.2319		3	26	21.1759		3	26	8.11055		3	26	10.965
3	26	8.71839		3	26	3.49941		3	26	17.3159		3	26	21.1759		3	26	7.63566		3	26	12.3632
4	26	5.72271		4	26	3.5185		4	26	37.2143		4	26	20.5865		4	26	12.1647		4	26	22.2552
4	26	5.1495		4	26	4.60646		4	26	39.073		4	26	15.7506		4	26	13.5548		4	26	18.6343
4	26	5.94832		4	26	3.66639		4	26	40.2937		4	26	22.1208		4	26	17.0862		4	26	24.9032
4	26	6.30927		4	26	3.43254		4	26	38.4761		4	26	19.3749		4	26	8.27553		4	26	26.7816
4	26	9.20482		4	26	3.43254		4	26	34.8337		4	26	15.8993		4	26	7.08255		4	26	31.9123
4	26	7.33187		4	26	3.36083		4	26	36.041		4	26	18.1056		4	26	6.95326		4	26	45.4293
4	26	5.99849		4	26	3.36083		4	26	40.3698		4	26	17.8739		4	26	13.0049		4	26	28.9004
4	26	6.27443		4	26	4.17498		4	26	35.7529		4	26	16.4911		4	26	11.9898		4	26	26.3383
4	26	7.27972		4	26	2.3985		4	26	27.8167		4	26	15.1631		4	26	13.4869		4	26	12.6648
4	26	7.5054		4	26	2.78672		4	26	36.927		4	26	21.8601		4	26	12.7066		4	26	23.4001
1	36	8.72453		1	36	2.94652		1	36	25.5457		1	36	12.811		1	36	18.548		1	36	15.5933
1	36	3.95519		1	36	2.28298		1	36	20.3719		1	36	9.25978		1	36	11.3806		1	36	16.8352
1	36	4.2016		1	36	1.96318		1	36	26.2007		1	36	12.6228		1	36	15.9663		1	36	11.5757
1	36	5.51205		1	36	2.9156		1	36	26.3946		1	36	12.1592		1	36	15.0347		1	36	15.5395
1	36	7.0403		1	36	2.44789		1	36	22.8748		1	36	11.551		1	36	13.2636		1	36	9.89392
1	36	5.04308		1	36	2.44789		1	36	26.9797		1	36	10.8907		1	36	11.8386		1	36	13.4954
1	36	5.23635		1	36	2.44789		1	36	30.3006		1	36	12.7153		1	36	10.7351		1	36	17.8477
1	36	5.09257		1	36	2.44789		1	36	29.3493		1	36	14.2395		1	36	10.631		1	36	12.6873
1	36	11.6356		1	36	3.77927		1	36	22.0723		1	36	11.0924		1	36	11.2588		1	36	17.2479
1	36	6.55522		1	36	3.12985		1	36	27.0698		1	36	7.2149		1	36	9.07738		1	36	18.9864
2	36	6.15123		2	36	4.11322		2	36	41.4922		2	36	19.6598		2	36	13.7075		2	36	15.1153
2	36	7.72866		2	36	2.96943		2	36	37.8017		2	36	21.2393		2	36	15.6678		2	36	21.6188
2	36	5.45869		2	36	3.66426		2	36	40.9693		2	36	23.3827		2	36	20.7192		2	36	16.7639
2	36	5.32994		2	36	3.04709		2	36	49.6766		2	36	29.3159		2	36	23.2626		2	36	16.7639
2	36	6.36598		2	36	2.44789		2	36	39.7001		2	36	22.7735		2	36	13.806		2	36	16.7639
2	36	5.79384		2	36	2.44789		2	36	48.1967		2	36	23.941		2	36	11.6326		2	36	16.7639
2	36	6.13453		2	36	2.44789		2	36	42.7602		2	36	23.1079		2	36	20.8173		2	36	21.3171
2	36	6.13961		2	36	3.23585		2	36	47.5469		2	36	23.4322		2	36	19.7879		2	36	16.7639
2	36	6.81598		2	36	3.35028		2	36	47.3288		2	36	24.3126		2	36	15.2032		2	36	14.7456
2	36	5.88698		2	36	3.50749		2	36	47.4226		2	36	28.4252		2	36	15.631		2	36	24.5019
3	36	4.42903		3	36	2.70508		3	36	19.2684		3	36	8.10465		3	36	19.1646		3	36	18.5437
3	36	4.61456		3	36	3.20026		3	36	26.4257		3	36	12.0256		3	36	8.52222		3	36	10.889
3	36	5.77524		3	36	3.24799		3	36	24.3909		3	36	18.4052		3	36	18.9274		3	36	14.7006
3	36	5.85479		3	36	3.26228		3	36	23.3898		3	36	15.7439		3	36	18.0247		3	36	12.6646
3	36	6.09976		3	36	3.26228		3	36	27.8323		3	36	11.9045		3	36	14.754		3	36	15.9993
3	36	5.23703		3	36	2.44789		3	36	19.7811		3	36	10.3156		3	36	10.0335		3	36	11.4571
3	36	6.11775		3	36	2.44789		3	36	26.0437		3	36	11.9715		3	36	14.4872		3	36	9.11955
3	36	4.77306		3	36	2.44789		3	36	28.5998		3	36	13.9051		3	36	15.4452		3	36	13.0856
3	36	8.62418		3	36	2.89437		3	36	25.5675		3	36	16.3421		3	36	13.9329		3	36	13.0256
3	36	6.34516		3	36	3.18568		3	36	18.2015		3	36	6.49014		3	36	10.4869		3	36	7.38017
4	36	6.97372		4	36	3.62274		4	36	25.3771		4	36	14.711		4	36	15.8051		4	36	17.3772
4	36	7.15682		4	36	3.9633		4	36	24.4276		4	36	14.967		4	36	17.7333		4	36	13.1727
4	36	6.83777		4	36	3.20316		4	36	25.0193		4	36	18.0756		4	36	13.9324		4	36	13.8132
4	36	5.34353		4	36	2.44789		4	36	25.1398		4	36	15.339		4	36	12.6172		4	36	13.3817
4	36	6.43862		4	36	2.44789		4	36	34.7906		4	36	13.9735		4	36	14.9606		4	36	15.4674
4	36	7.83615		4	36	2.44789		4	36	26.0754		4	36	14.9161		4	36	14.9964		4	36	13.0031
4	36	7.40778		4	36	2.44789		4	36	28.428		4	36	12.7282		4	36	13.5348		4	36	12.0002
4	36	5.46544		4	36	3.53302		4	36	24.1174		4	36	13.4761		4	36	18.3103		4	36	11.2561
4	36	7.27972		4	36	2.3985		4	36	27.8173		4	36	15.1631		4	36	13.4869		4	36	12.6648
4	36	6.77567		4	36	4.48644		4	36	36.7325		4	36	21.2919		4	36	13.5324		4	36	13.0747
1	46	8.22881		1	46	2.89181		1	46	36.1125		1	46	17.7908		1	46	14.6596		1	46	13.3777
1	46	8.22881		1	46	2.44513		1	46	28.0848		1	46	19.334		1	46	9.81159		1	46	19.8486
1	46	3.99452		1	46	1.91399		1	46	22.9814		1	46	19.8064		1	46	11.0081		1	46	12.1328
1	46	6.24786		1	46	4.80031		1	46	30.9207		1	46	25.1729		1	46	10.1004		1	46	9.47435
1	46	6.31193		1	46	5.5595		1	46	16.8543		1	46	11.7567		1	46	24.7505		1	46	20.6451
1	46	4.72076		1	46	5.5595		1	46	23.5425		1	46	11.5136		1	46	20.8687		1	46	22.5613
1	46	4.61053		1	46	5.8218		1	46	29.1407		1	46	21.9623		1	46	17.0626		1	46	21.9907
1	46	4.81109		1	46	7.16902		1	46	21.0539		1	46	17.1556		1	46	11.1309		1	46	14.0723
1	46	8.22881		1	46	4.061		1	46	26.0913		1	46	4.69154		1	46	13.1961		1	46	19.934
1	46	5.98969		1	46	4.04508		1	46	22.5366		1	46	10.395		1	46	8.55123		1	46	16.4589
2	46	6.66795		2	46	2.91898		2	46	44.4581		2	46	27.9228		2	46	18.315		2	46	24.3333
2	46	4.77359		2	46	2.27279		2	46	31.1994		2	46	22.1447		2	46	15.6657		2	46	15.8589
2	46	6.33372		2	46	3.50071		2	46	33.4086		2	46	31.3115		2	46	20.1071		2	46	23.5197
2	46	5.89662		2	46	3.07636		2	46	47.1601		2	46	24.6784		2	46	17.0378		2	46	15.8589
2	46	5.70054		2	46	5.5595		2	46	34.2208		2	46	22.5282		2	46	14.0028		2	46	32.6399
2	46	6.00487		2	46	5.5595		2	46	42.6179		2	46	23.8223		2	46	12.5064		2	46	23.8147
2	46	5.3638		2	46	6.91671		2	46	46.537		2	46	30.5811		2	46	18.8922		2	46	15.8589
2	46	5.49247		2	46	3.75745		2	46	42.0936		2	46	22.1006		2	46	14.0041		2	46	19.1338
2	46	6.22516		2	46	3.80187		2	46	45.6025		2	46	22.2729		2	46	21.1033		2	46	19.6967
2	46	6.81826		2	46	3.3735		2	46	32.2122		2	46	25.8093		2	46	12.7122		2	46	15.8589
3	46	4.27235		3	46	2.45717		3	46	21.6158		3	46	9.05879		3	46	16.6818		3	46	12.8132
3	46	4.5744		3	46	4.545		3	46	23.9328		3	46	9.63026		3	46	13.2305		3	46	22.2301
3	46	4.42683		3	46	4.13783		3	46	22.9266		3	46	19.7602		3	46	15.0207		3	46	15.659
3	46	4.16623		3	46	4.73108		3	46	26.6787		3	46	25.0253		3	46	11.8028		3	46	16.5168
3	46	4.93012		3	46	5.5595		3	46	18.6655		3	46	13.3281		3	46	18.7725		3	46	21.087
3	46	4.74141		3	46	5.5595		3	46	28.6661		3	46	12.1324		3	46	11.6993		3	46	11.3815
3	46	6.10727		3	46	5.5595		3	46	29.4488		3	46	15.3837		3	46	11.9557		3	46	14.3584
3	46	5.11458		3	46	5.5595		3	46	41.9949		3	46	16.5507		3	46	11.9144		3	46	16.5703
3	46	7.84389		3	46	3.4478		3	46	23.4152		3	46	10.736		3	46	10.7544		3	46	19.7728
3	46	8.16297		3	46	4.1575		3	46	19.1688		3	46	4.84908		3	46	10.3774		3	46	11.5734
4	46	5.89305		4	46	6.73325		4	46	32.586		4	46	20.2483		4	46	21.6327		4	46	15.8589
4	46	6.34541		4	46	5.80322		4	46	23.9732		4	46	14.4551		4	46	17.0378		4	46	15.8589
4	46	5.37701		4	46	5.5595		4	46	35.029		4	46	14.2128		4	46	15.0237		4	46	15.8589
4	46	5.94034		4	46	5.5595		4	46	32.2956		4	46	14.5376		4	46	45.2514		4	46	15.8589
4	46	5.70107		4	46	5.5595		4	46	37.8999		4	46	13.2847		4	46	17.0378		4	46	17.3305
4	46	5.38946		4	46	6.49577		4	46	39.1719		4	46	21.5082		4	46	22.6267		4	46	15.507
4	46	6.43597		4	46	5.5595		4	46	31.4095		4	46	13.0512		4	46	21.8712		4	46	20.6355
4	46	5.59996		4	46	7.34573		4	46	38.9316		4	46	20.7735		4	46	23.7132		4	46	16.2104
4	46	5.81464		4	46	7.34573		4	46	38.4813		4	46	21.3195		4	46	26.2707		4	46	16.332
4	46	7.26105		4	46	5.10283		4	46	33.9867		4	46	14.9645		4	46	21.5446		4	46	15.8589

## Sheet: Angular deviation
LOUPE	TOOTH	NECK ANGULATION	TRUNK ANGULATION
1	16	30.3	2.1
1	16	46	3
1	16	35.8	2.9
1	16	39	1.7
1	16	45	2.5
1	16	36	1.8
1	16	35.5	2
1	16	31.8	2.3
1	16	29.2	1.7
1	16	30.7	1.8
2	16	52.5	2
2	16	45	2.3
2	16	42.7	1.4
2	16	28.6	1.9
2	16	40	2.1
2	16	31	1.7
2	16	29.9	2.3
2	16	30.4	2.2
2	16	32.5	2.6
2	16	31.1	2
3	16	35.4	1.8
3	16	29.9	1.5
3	16	41.4	1.4
3	16	29.7	2.7
3	16	31.6	2.4
3	16	36.4	2.2
3	16	24.9	2
3	16	30.6	1.8
3	16	26.4	1.9
3	16	30.3	1.9
4	16	32.3	2.4
4	16	25.7	2.8
4	16	28.8	2.8
4	16	36.3	1.5
4	16	27.6	1.9
4	16	33.7	1.9
4	16	24.2	1.9
4	16	27.8	1.6
4	16	28.4	1.8
4	16	25.4	2
1	26	32	1.9
1	26	38.8	3.6
1	26	35.8	1.2
1	26	41.8	2.6
1	26	40.7	2.7
1	26	34	2.3
1	26	42.6	2.9
1	26	35.3	2.1
1	26	28.2	2.4
1	26	29.8	2.5
2	26	42.3	4
2	26	37.5	1.8
2	26	50	1.5
2	26	33.7	1.8
2	26	42.7	2.1
2	26	39	1.9
2	26	33.2	1.9
2	26	33.7	2
2	26	35	2.8
2	26	29.7	2.1
3	26	33.1	2.1
3	26	33.7	1.8
3	26	32.6	2.7
3	26	32	2.2
3	26	32.2	2.5
3	26	42.1	2.3
3	26	23.6	2.2
3	26	25.3	2
3	26	25	2.1
3	26	30.1	1.9
4	26	32.5	2.1
4	26	34	2.8
4	26	31	2.8
4	26	28.5	1.5
4	26	30	1.9
4	26	34.3	1.9
4	26	24.5	2.3
4	26	28	1.8
4	26	27.5	2.1
4	26	24.9	1.8
1	36	30.1	1.9
1	36	32.1	1.3
1	36	31.2	1.4
1	36	34.8	1.6
1	36	35.4	1.8
1	36	33.7	2.5
1	36	39.7	2.3
1	36	27.4	2
1	36	28.2	1.8
1	36	31.8	1.9
2	36	33.9	2.3
2	36	36.5	1.9
2	36	34.2	1.7
2	36	34.5	2.6
2	36	41.6	2
2	36	26.3	1.6
2	36	30.3	1.8
2	36	24.7	1.9
2	36	28.2	2.1
2	36	30.2	1.8
3	36	26.6	2
3	36	32.3	1.5
3	36	32	2
3	36	26.6	2.3
3	36	25.9	1.7
3	36	32.3	1.9
3	36	15.8	1.5
3	36	27.5	1.7
3	36	20.8	1.9
3	36	25.1	1.7
4	36	30.5	1.9
4	36	18.6	1.8
4	36	24.1	1.5
4	36	26.9	2.3
4	36	20.6	1.5
4	36	27.7	1.8
4	36	20.7	1.6
4	36	24.1	1.5
4	36	25.1	1.6
4	36	29.7	2
1	46	33.4	2.9
1	46	35.8	1.6
1	46	32	1.2
1	46	35	1.4
1	46	38.5	2.1
1	46	31.3	1.6
1	46	35.7	2.8
1	46	37.3	2.4
1	46	27.4	2.2
1	46	30.7	2
2	46	29.8	1.5
2	46	32.8	2.7
2	46	34.5	2.4
2	46	31	2.9
2	46	35.5	1.4
2	46	25.4	2
2	46	29.9	2.3
2	46	26.6	1.9
2	46	31.6	1.9
2	46	30.3	1.9
3	46	29.1	1.4
3	46	37.9	1.3
3	46	29.5	1.7
3	46	32.1	1.7
3	46	27.7	1.7
3	46	28.3	2
3	46	25.2	1.3
3	46	33.7	2.1
3	46	26.6	1.9
3	46	27.8	1.6
4	46	21.5	1.6
4	46	22.8	1.6
4	46	25.3	1.8
4	46	30.8	1.9
4	46	25.5	2.4
4	46	27.2	2
4	46	26	2.1
4	46	28.4	2.5
4	46	29.1	1.7
4	46	33.9	1.7

## Sheet: escores
Magnification system			Tooth
1	Naked eye		16	Right upper first molar
2	Simple Loupe		26	Left upper first molar
3	Galilean Loupe		36	Left lower first molar
4	Keplerian Loupe		46	Right lower first molar
